# Supplementary material
Source: HighWire-hosted journal article supplement (https://srh.bmj.com/highwire/filestream/141564/field_highwire_adjunct_files/0/bmjsrh-2021-201170supp001_data_supplement.pdf)
Supplement: bmjsrh-2021-201170supp001_data_supplement.pdf [file bmjsrh-2021-201170supp001_data_supplement.pdf]

**Table S1. Interview topic guide for qualitative study of obstetricians and midwives perspectives on PPIUD**

| Domain                                 | Topic Probes (outline)                                                                                                                                                                                                                                                                                                                                                                                                                                                                                                                                                                                                                                                                                                                                                                                                                                                                                                                                                                                                                                                                                                                                                                                                                                                                                                                                                                                                                                                            |
|----------------------------------------|-----------------------------------------------------------------------------------------------------------------------------------------------------------------------------------------------------------------------------------------------------------------------------------------------------------------------------------------------------------------------------------------------------------------------------------------------------------------------------------------------------------------------------------------------------------------------------------------------------------------------------------------------------------------------------------------------------------------------------------------------------------------------------------------------------------------------------------------------------------------------------------------------------------------------------------------------------------------------------------------------------------------------------------------------------------------------------------------------------------------------------------------------------------------------------------------------------------------------------------------------------------------------------------------------------------------------------------------------------------------------------------------------------------------------------------------------------------------------------------|
| <b>Role in PPIUD provision</b>         | <ul style="list-style-type: none"> <li>• Current role; length of time in this role; grade/experience</li> <li>• Current role of in PPIUD provision</li> </ul>                                                                                                                                                                                                                                                                                                                                                                                                                                                                                                                                                                                                                                                                                                                                                                                                                                                                                                                                                                                                                                                                                                                                                                                                                                                                                                                     |
| <b>Views on the provision of PPIUD</b> | <ul style="list-style-type: none"> <li>• Potential benefits of PPIUD</li> <li>• Potential drawbacks of PPIUD</li> <li>• Are there any groups of women that you think might particularly benefit from PPIUD? Or that should be excluded from PPIUD?</li> <li>• Views on PPIUD prior to start of service/implementation <ul style="list-style-type: none"> <li>○ Challenges – anticipated</li> <li>○ Challenges – barriers encountered</li> </ul> </li> </ul> <p>‘During’ and ‘After’ Questions</p> <ul style="list-style-type: none"> <li>• Since you began providing PPIUD service have you taken any steps to changes workflow/practice? <ul style="list-style-type: none"> <li>○ Used, adapted, created new procedures</li> </ul> </li> <li>• Has there been collective ‘buy-in’ to the importance of PPIUD service provision?</li> <li>• How is PPIUD different from your current ways of working?</li> <li>• What does PPIUD require of you in your role (individual requirements)?</li> <li>• Do other HCPs (midwives, obstetricians) involved agree about the purpose of providing PPIUD (collectively agree purpose)? <ul style="list-style-type: none"> <li>○ If not, why not? Divergent views?</li> </ul> </li> <li>• Do you agree that PPIUD should be part of your job role? <ul style="list-style-type: none"> <li>○ Midwives?</li> <li>○ Obstetricians?</li> </ul> </li> <li>• PPIUD in relation to staff role/grade; views on who should undertake PPIUD</li> </ul> |
| <b>Time/Timing</b>                     | <ul style="list-style-type: none"> <li>• Views on the provision of IUD immediately after delivery (timing)</li> <li>• Benefits and drawbacks to IUD insertion <ul style="list-style-type: none"> <li>○ Immediately after delivery of placenta</li> <li>○ 1-2 hours after delivery</li> <li>○ Within 48 hours</li> </ul> </li> <li>• Time pressures (relating to other aspects of job role)</li> <li>• Time for insertion; sufficient/insufficient</li> </ul>                                                                                                                                                                                                                                                                                                                                                                                                                                                                                                                                                                                                                                                                                                                                                                                                                                                                                                                                                                                                                      |
| <b>Training and leadership</b>         | <ul style="list-style-type: none"> <li>• Motivations to participate in PPIUD training</li> <li>• Views on who should be trained in PPIUD <ul style="list-style-type: none"> <li>○ All grades? More experienced?</li> </ul> </li> <li>• Views on what should be included on training for HCPs on benefits of LARC (generally) PPIUD (specifically)</li> <li>• Views on timing of training (depending on job role; midwife or obstetrician)</li> <li>• Experience of the training</li> <li>• Experience of supervised practice <ul style="list-style-type: none"> <li>○ More/longer supervised practice needed?</li> <li>○ Confidence around insertion/fitting of IUD?</li> </ul> </li> <li>• Further/other training needs identified</li> <li>• Views on PPIUD leadership; leadership roles in implementation and service development?</li> </ul>                                                                                                                                                                                                                                                                                                                                                                                                                                                                                                                                                                                                                                  |
| <b>Pre-procedure information</b>       | <ul style="list-style-type: none"> <li>• What information do you as HCP(s) routinely provide women with prior to the procedure?</li> <li>• How are the potential benefits/risks communicated?</li> <li>• Use of checklist for insertion?</li> <li>• Do you think women are given sufficient time to decide whether they want PPIUD?</li> </ul>                                                                                                                                                                                                                                                                                                                                                                                                                                                                                                                                                                                                                                                                                                                                                                                                                                                                                                                                                                                                                                                                                                                                    |

|                                   |                                                                                                                                                                                                                                                                                                                                                                                                                                                                                                                                                                                                                                                                                                                                                                                                                                                                                                                                                                                                                                                                          |
|-----------------------------------|--------------------------------------------------------------------------------------------------------------------------------------------------------------------------------------------------------------------------------------------------------------------------------------------------------------------------------------------------------------------------------------------------------------------------------------------------------------------------------------------------------------------------------------------------------------------------------------------------------------------------------------------------------------------------------------------------------------------------------------------------------------------------------------------------------------------------------------------------------------------------------------------------------------------------------------------------------------------------------------------------------------------------------------------------------------------------|
| <b>Fitting/Insertion of PPIUD</b> | <ul style="list-style-type: none"> <li>• Revisiting consent for insertion with women <ul style="list-style-type: none"> <li>○ When? How? Who?</li> </ul> </li> <li>• Logistical issues: bed space on labour ward; availability of IUS/IUD</li> <li>• Staffing levels: <ul style="list-style-type: none"> <li>○ Trained staff available for insertion/supervision of insertion?</li> </ul> </li> <li>• Movement of women between antenatal, labour and maternity/postnatal wards – implications for service delivery</li> </ul>                                                                                                                                                                                                                                                                                                                                                                                                                                                                                                                                           |
| <b>Birth experience</b>           | <ul style="list-style-type: none"> <li>• Views on the effect of IUD insertion on women's birth experience</li> <li>• Views on possible impact of delays to insertion on women</li> <li>• If/how IUD insertion immediately following delivery affects the time women can spend with baby ('golden hour')?</li> </ul>                                                                                                                                                                                                                                                                                                                                                                                                                                                                                                                                                                                                                                                                                                                                                      |
| <b>Bonding and breastfeeding</b>  | <ul style="list-style-type: none"> <li>• Do you feel that PPIUD could affect mother's ability to bond with their baby after the birth?</li> <li>• Do you feel that PPIUD could have/has an effect on mother's ability to breastfeed?</li> </ul>                                                                                                                                                                                                                                                                                                                                                                                                                                                                                                                                                                                                                                                                                                                                                                                                                          |
| <b>Post-procedure information</b> | <ul style="list-style-type: none"> <li>• Role in information provision for women following insertion</li> <li>• Views on provision of information for women about what to expect after insertion of IUD</li> <li>• Views on provision of information for women about when and how to seek help after PPIUD</li> <li>• What other information do you think women need in the post-procedure period?</li> <li>• Communication with other services (i.e. primary care (GP), specialist services)</li> </ul>                                                                                                                                                                                                                                                                                                                                                                                                                                                                                                                                                                 |
| <b>Delivery of the service</b>    | <ul style="list-style-type: none"> <li>• Views on the way in which PPIUD service has been introduced within NHS Lothian</li> <li>• Would you change anything about PPIUD service provision?</li> <li>• What would support PPIUD at SVD (and C-Section) to become embedded as a 'day-to-day service'?</li> </ul> <p>'After' questions</p> <ul style="list-style-type: none"> <li>• Have you as a [midwife/obstetrician] been able to judge the effectiveness of the intervention? <ul style="list-style-type: none"> <li>○ How? [Probe mechanisms]</li> </ul> </li> <li>• How have you collectively [midwives/obstetricians] judge the effectiveness of the intervention?</li> <li>• Have you collectively [midwives/obstetricians] been able to modify the intervention based on evaluation and experience? <ul style="list-style-type: none"> <li>○ In what ways?</li> </ul> </li> <li>• Issues around funding and budgets? <ul style="list-style-type: none"> <li>○ Cost/funding implications of going from implementation to 'normal practice'</li> </ul> </li> </ul> |
| <b>Service development</b>        | <ul style="list-style-type: none"> <li>• Do you think that PPIUD service should be available to women in other regions across Scotland? Why/why not?</li> <li>• If this service was to be offered in other health boards/regions, are there any issues that need to be addressed? What? Why?</li> <li>• What resources are needed to support PPIUD implementation beyond Lothian?</li> <li>• What are they? How can they be addressed?</li> </ul>                                                                                                                                                                                                                                                                                                                                                                                                                                                                                                                                                                                                                        |
